# Supplementary material for: An intellectual-disability-associated mutation of the transcriptional regulator NACC1 impairs glutamatergic neurotransmission
Source: PubMed Central journal article supplement (PMC10393139; doi:10.3389/fnmol.2023.1115880), 2023-07-14
Supplement: Data_Sheet_1.pdf [file Data_Sheet_1.pdf]

## Supplementary Figure 2

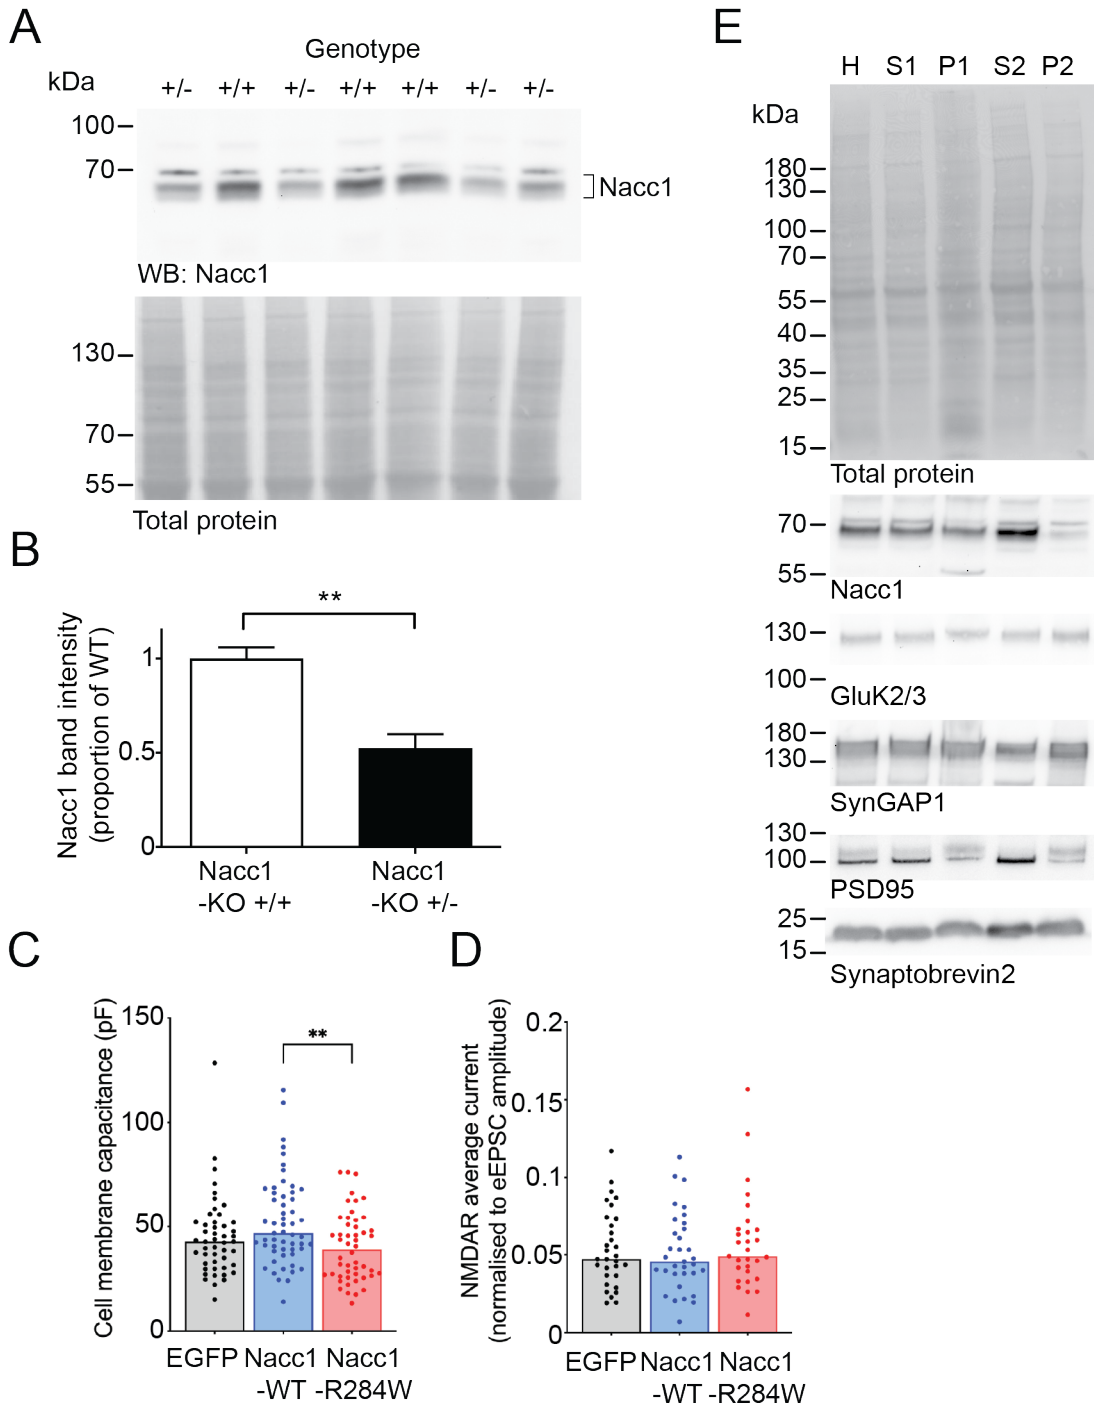

# Supplementary Figure 3

A

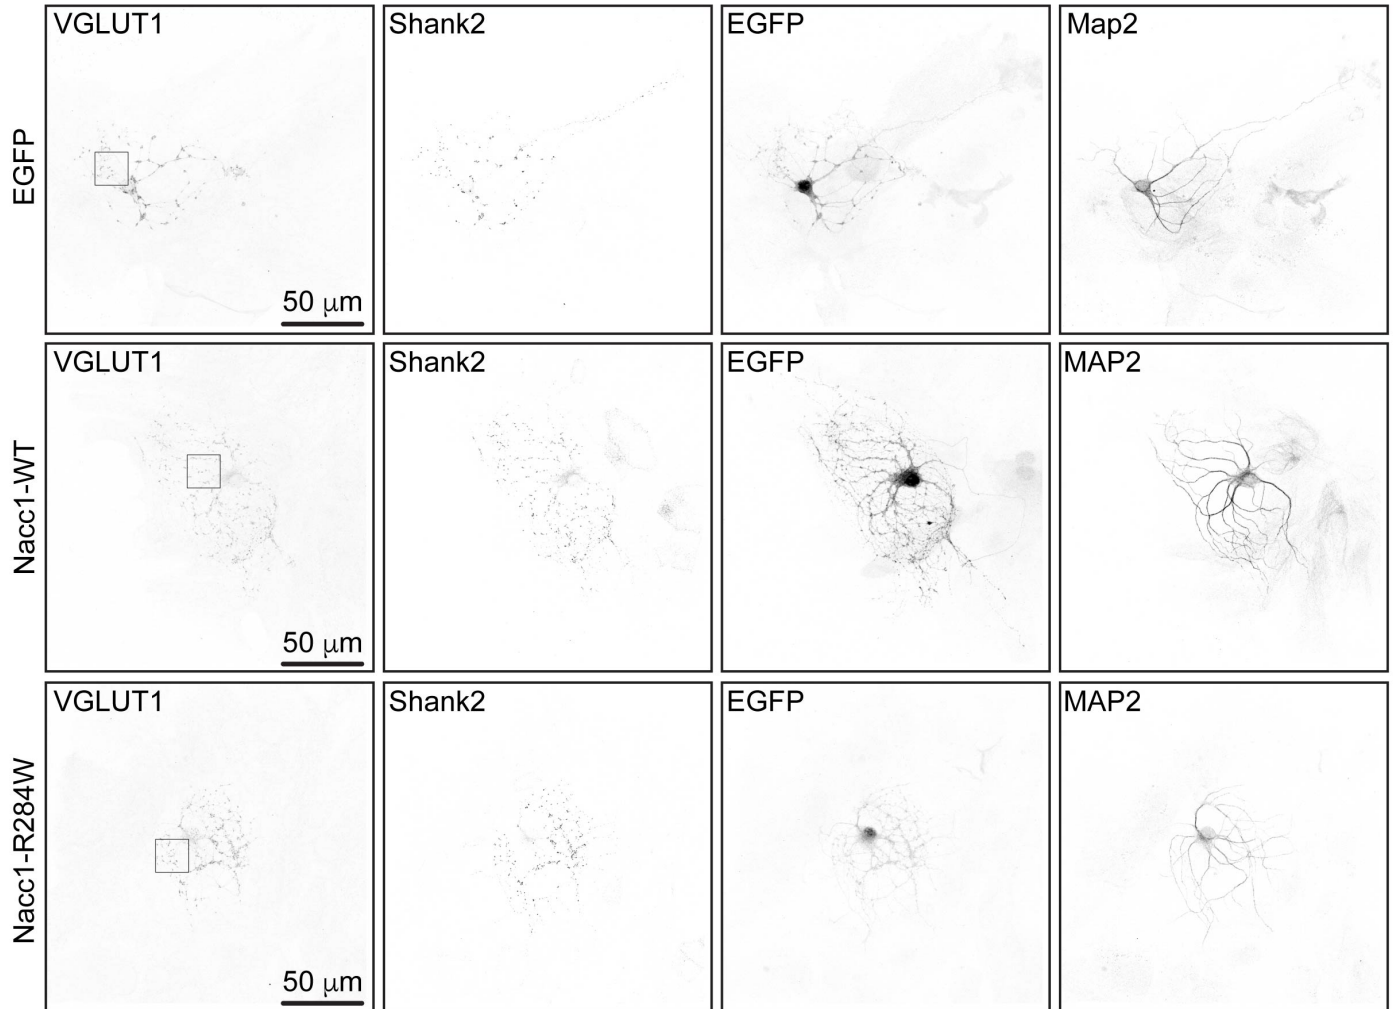

B

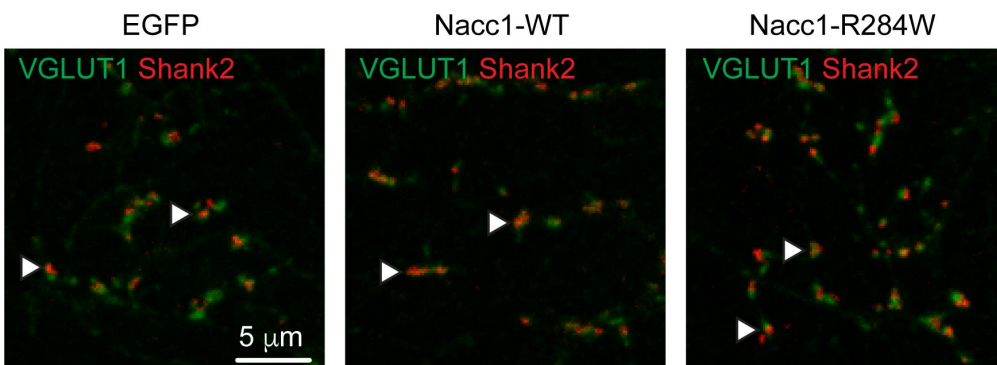

C

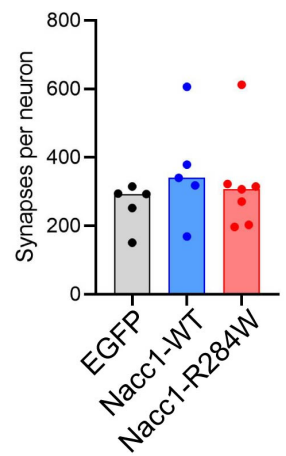

# Supplementary Figure 4

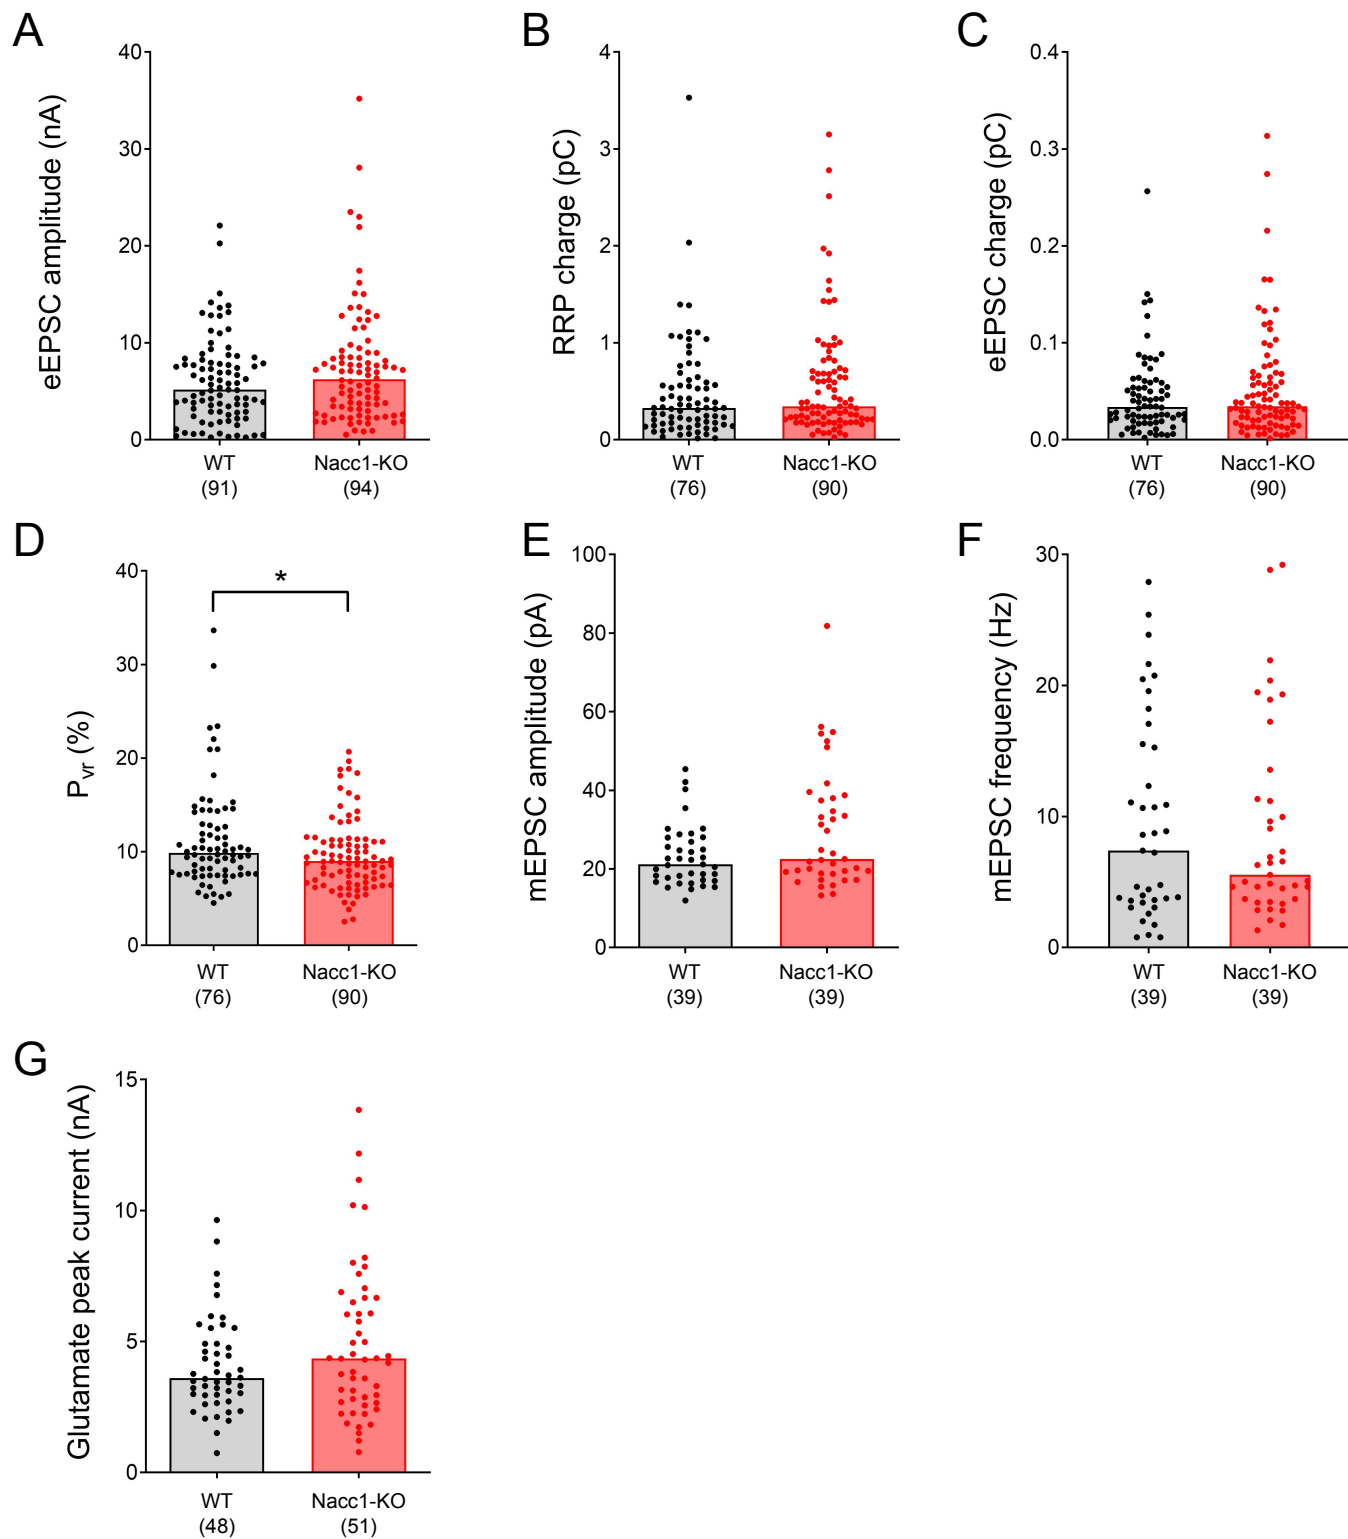



# Supplementary Figure 5

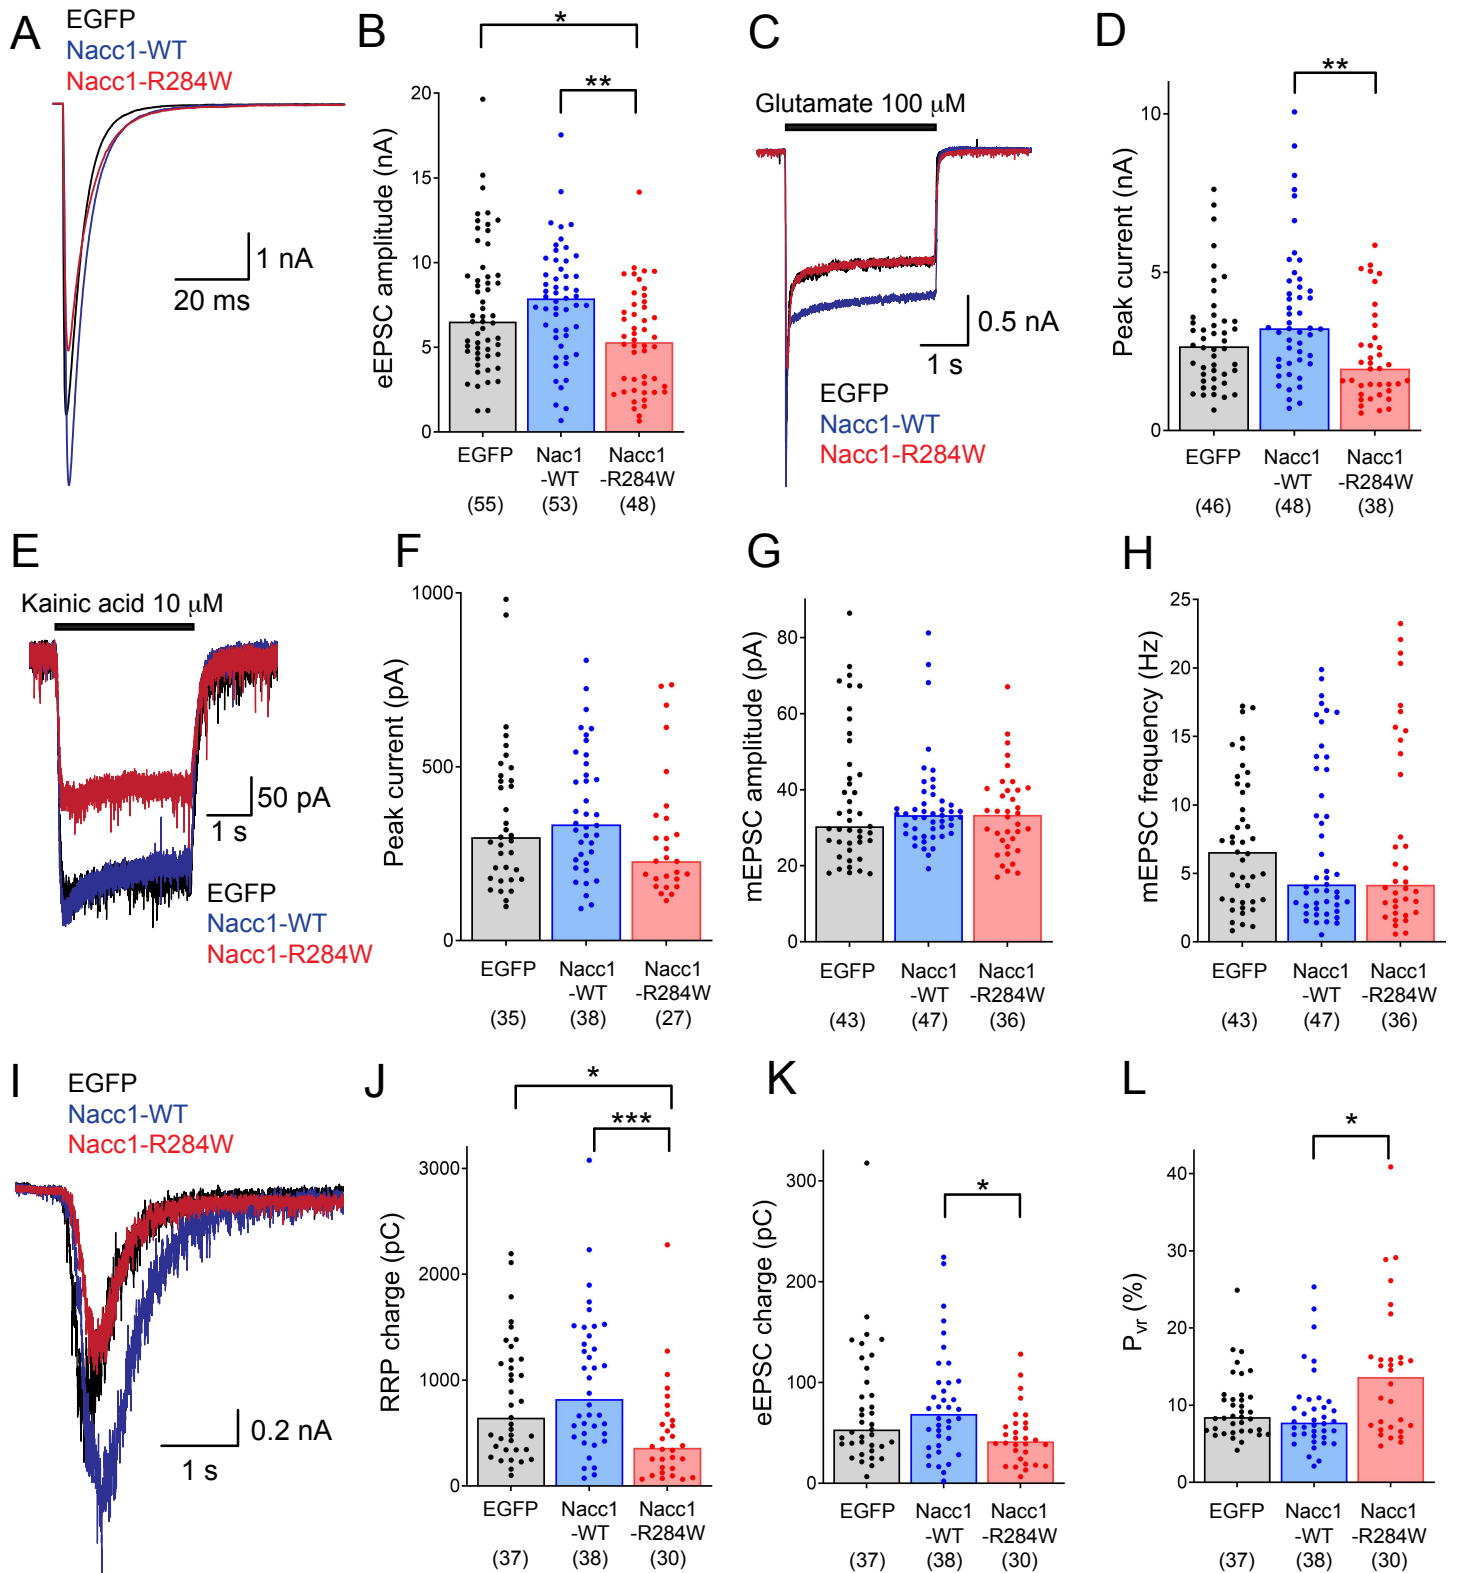

# Supplementary Figure 6

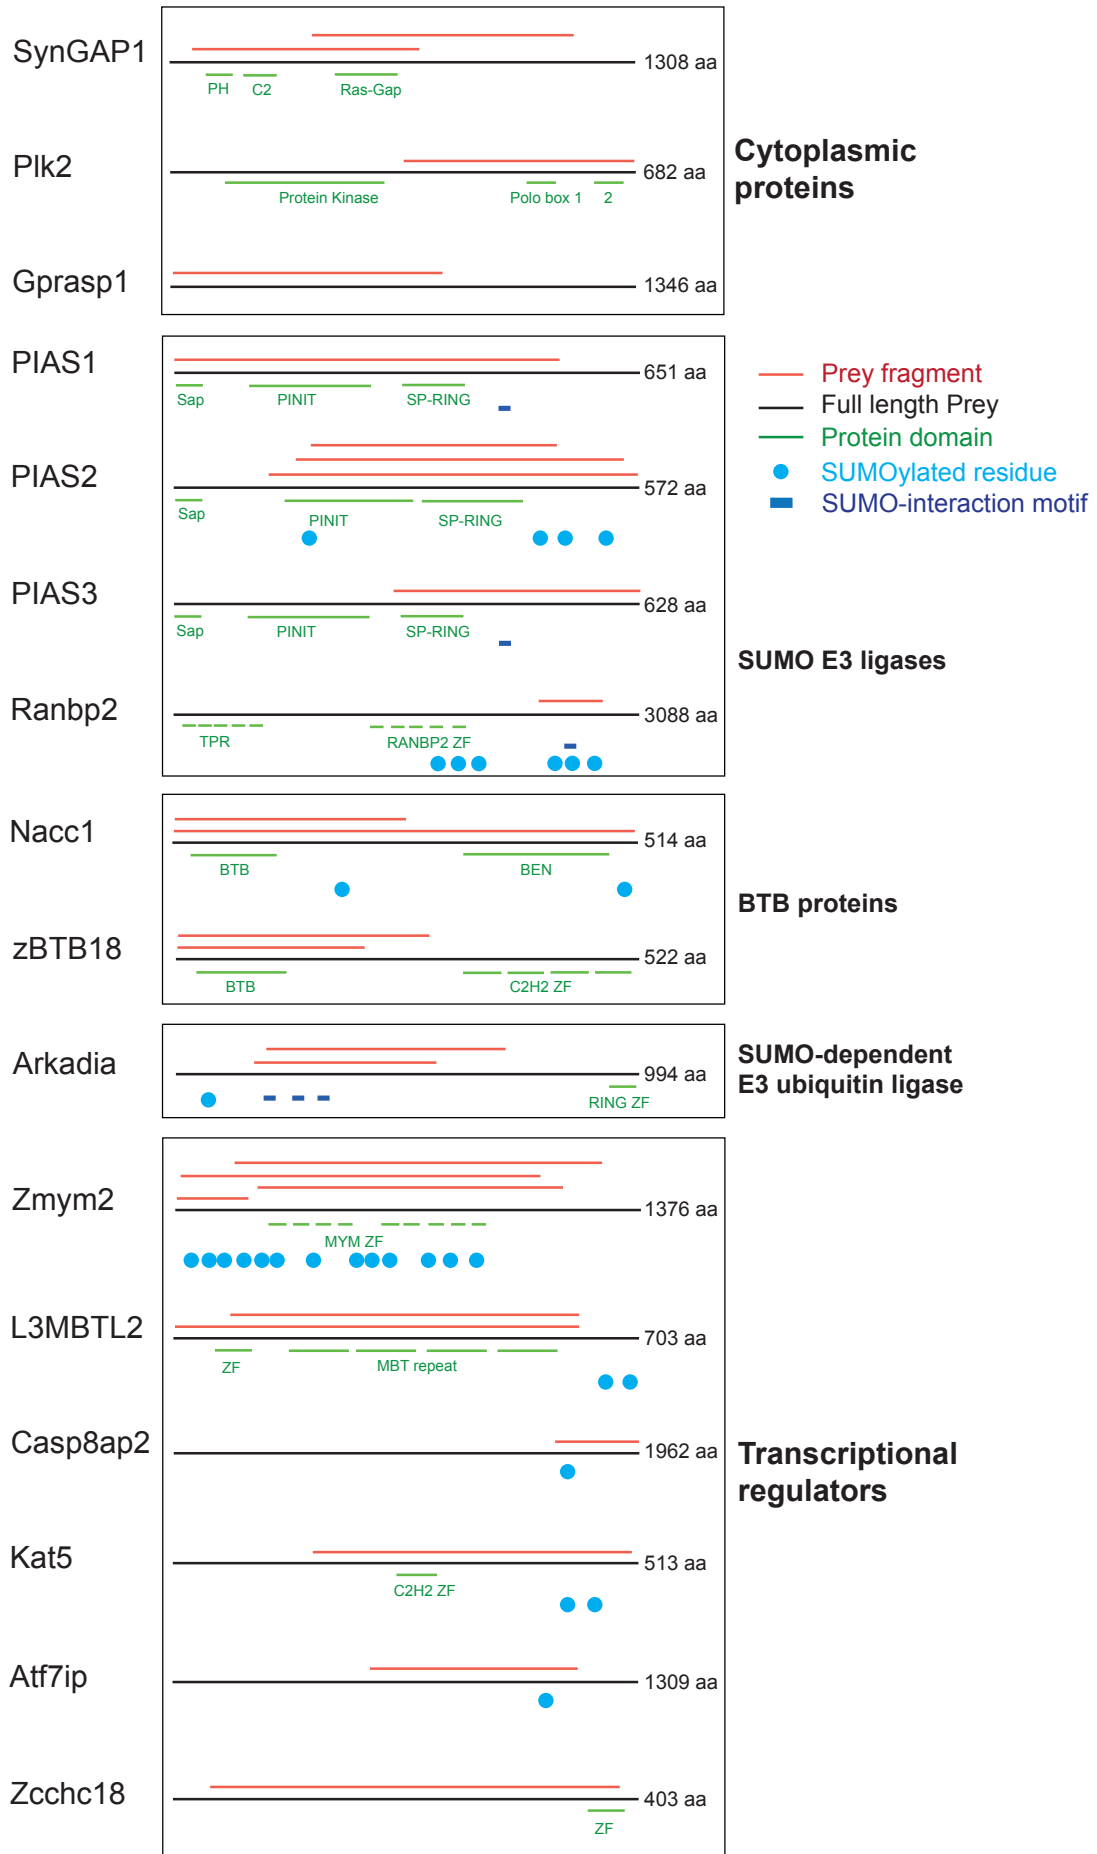

# Supplementary Figure 7

## A

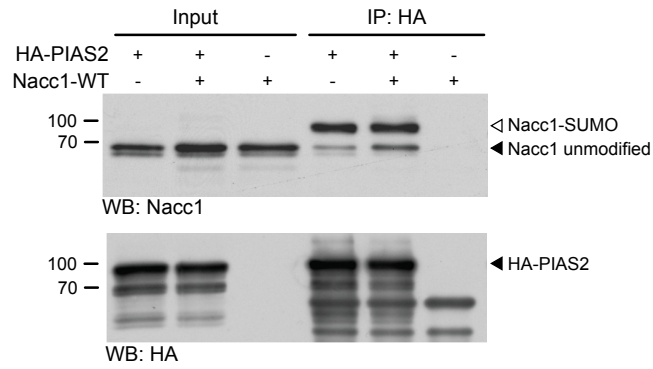

## B

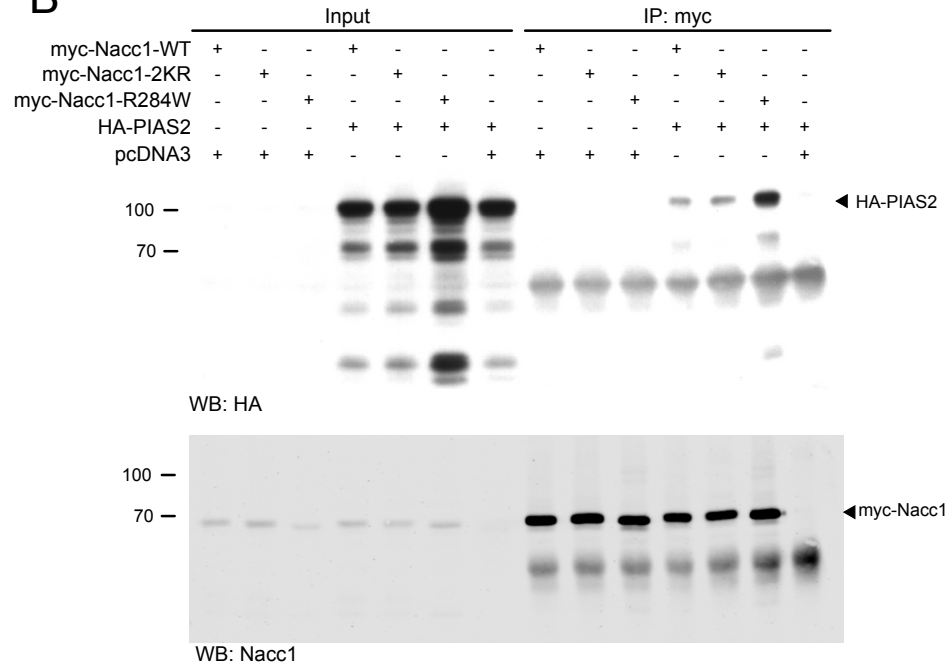

# Supplementary Figure 8

**A**

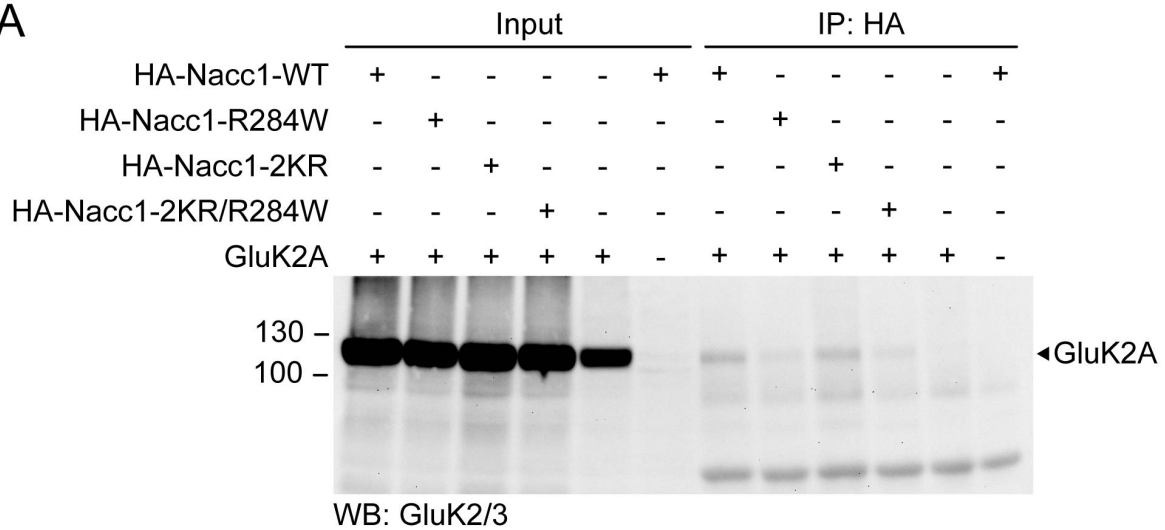

**B**

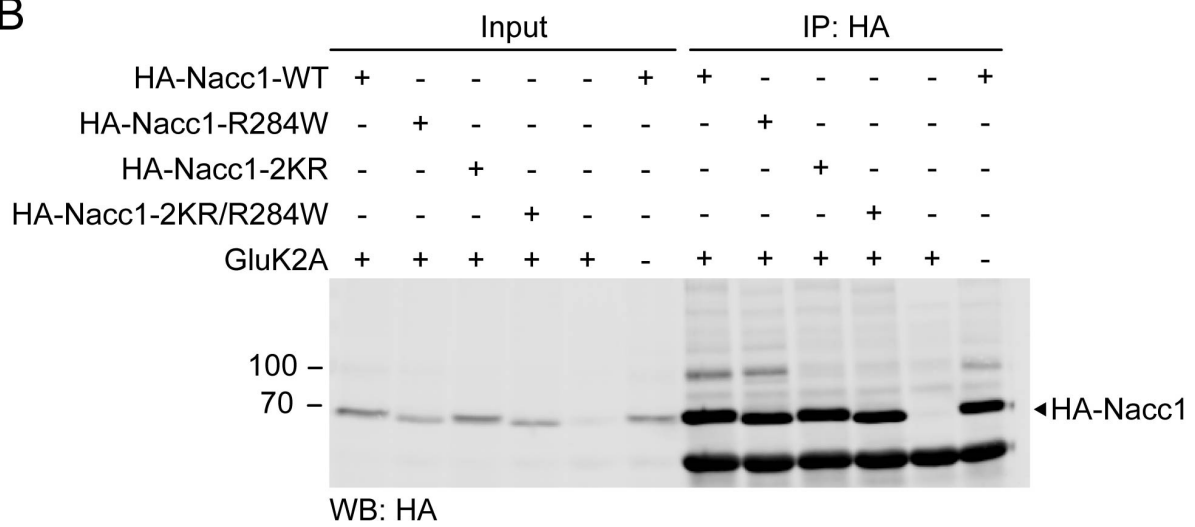

**C**

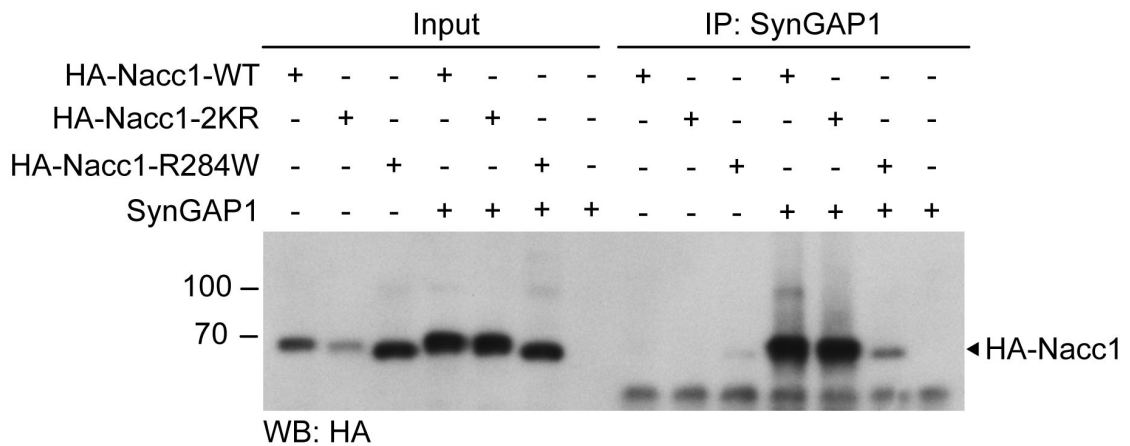

**D**

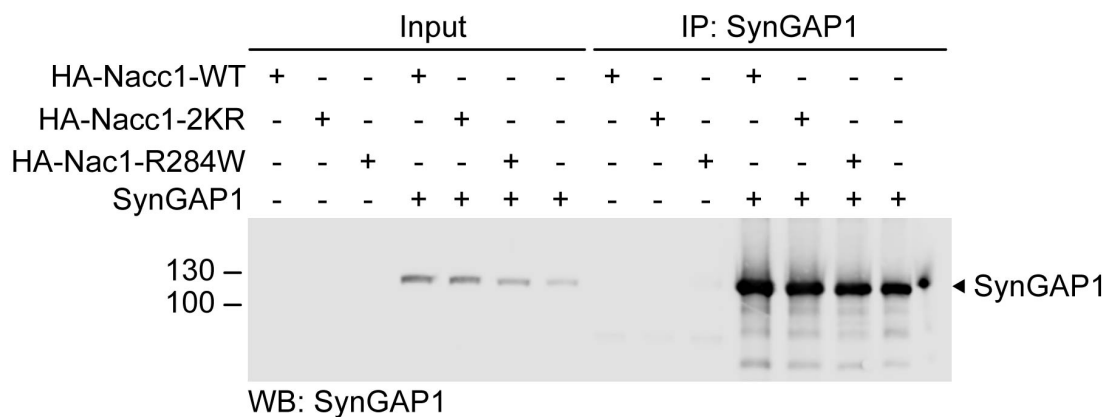

# Supplementary Figure 9

**A**

|             | Input |   |   |   |   | IP: HA |   |   |   |   |
|-------------|-------|---|---|---|---|--------|---|---|---|---|
| Nacc1-WT    | -     | + | - | - | - | -      | + | - | - | - |
| Nacc1-K167R | -     | - | + | - | - | -      | - | + | - | - |
| Nacc1-K485R | -     | - | - | + | - | -      | - | - | + | - |
| Nacc1-2KR   | -     | - | - | - | + | -      | - | - | - | + |
| eGFP        | +     | - | - | - | - | +      | - | - | - | - |
| HA-SUMO1    | +     | + | + | + | + | +      | + | + | + | + |

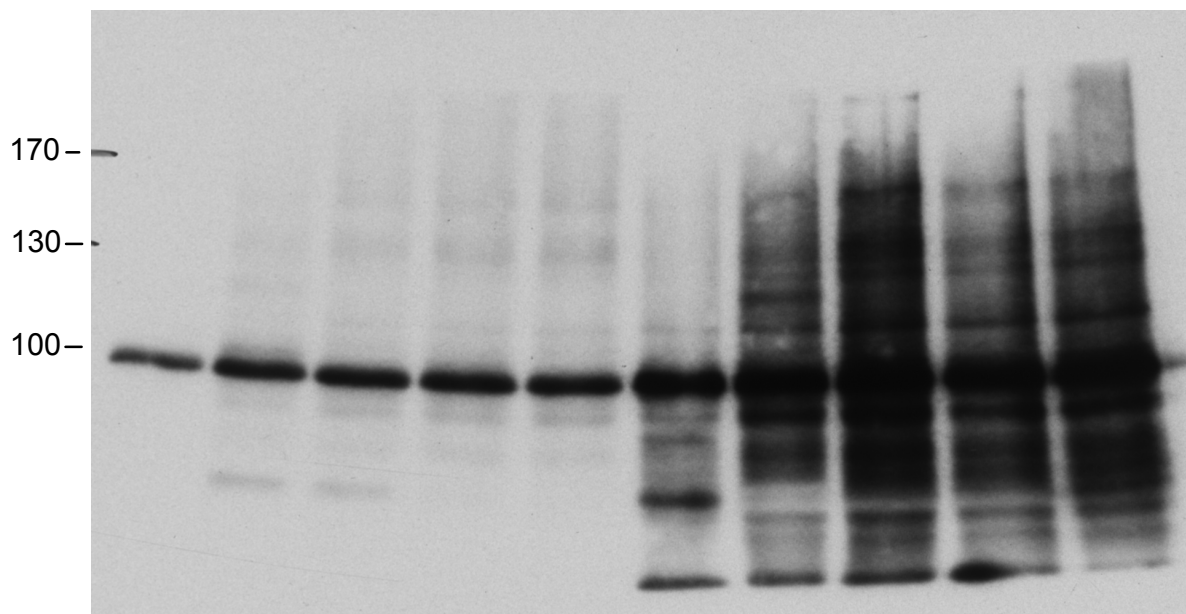

WB: HA

**B**

|             | Input |   |   |   |   | IP: HA |   |   |   |   |
|-------------|-------|---|---|---|---|--------|---|---|---|---|
| Nacc1-WT    | -     | + | - | - | - | -      | + | - | - | - |
| Nacc1-K167R | -     | - | + | - | - | -      | - | + | - | - |
| Nacc1-K485R | -     | - | - | + | - | -      | - | - | + | - |
| Nacc1-2KR   | -     | - | - | - | + | -      | - | - | - | + |
| eGFP        | +     | - | - | - | - | +      | - | - | - | - |
| HA-SUMO2    | +     | + | + | + | + | +      | + | + | + | + |

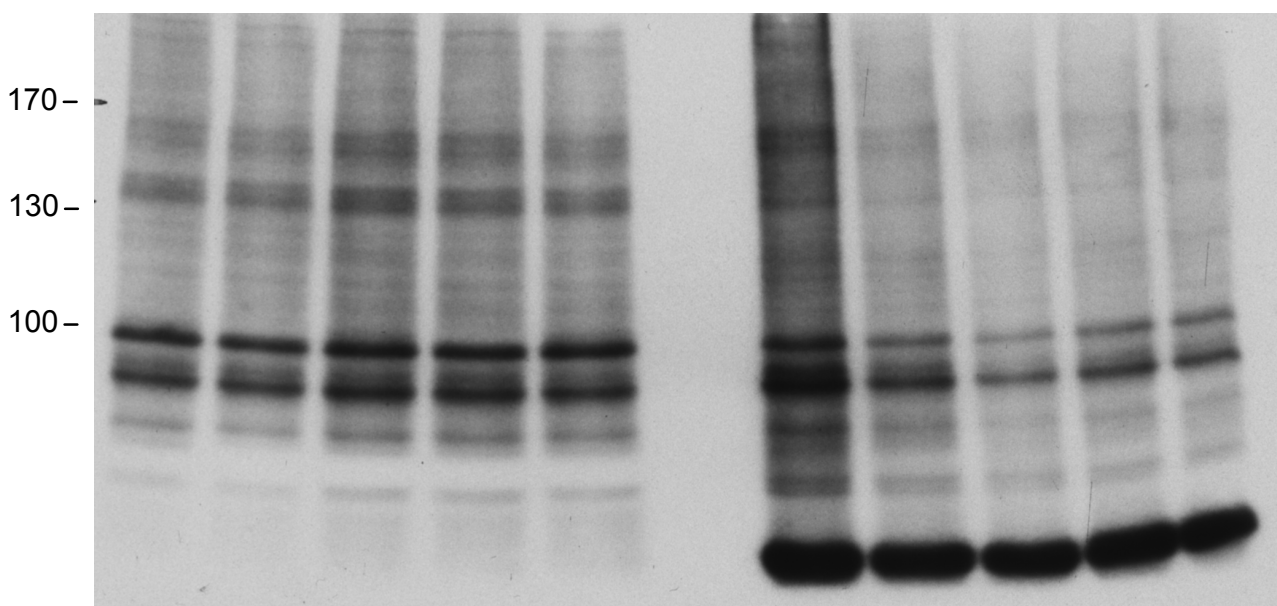

WB: HA
